# Supplementary material for: Reversal of Bortezomib-Induced Neurotoxicity by Suvecaltamide, a Selective T-Type Ca-Channel Modulator, in Preclinical Models
Source: MDPI journal article supplement (doi:10.3390/cancers13195013), 2021-10-07
Supplement: s1 [file s1]

## Supplementary Material

**Table S1.** Treatment Group Comparisons and Statistical Analysis of Endpoints in the *In Vivo* Studies

| NCV OF CAUDAL NERVE (BASELINE) (Figure 1) |                        |
|-------------------------------------------|------------------------|
| Mann-Whitney test                         |                        |
| P value                                   | 0.4464                 |
| Exact or approximate P value?             | Gaussian Approximation |
| One- or two-tailed P value?               | Two-tailed             |
| Sum of ranks in column A (CTRL), B (BTZ)  | 187, 633               |
| Mann-Whitney U                            | 105.0                  |

| NCV OF CAUDAL NERVE (4 WEEKS) (Figure 1) |                        |
|------------------------------------------|------------------------|
| Mann-Whitney test                        |                        |
| P value                                  | 0.0029                 |
| Exact or approximate P value?            | Gaussian Approximation |
| One- or two-tailed P value?              | Two-tailed             |
| Sum of ranks in column A (CTRL), B (BTZ) | 74, 136                |
| Mann-Whitney U                           | 0.0000                 |

| NCV OF CAUDAL NERVE (5 WEEKS) (Figure 1) |                        |         |
|------------------------------------------|------------------------|---------|
| Kruskal-Wallis test                      |                        |         |
| P value                                  | 0.0200                 |         |
| Dunn's Multiple Comparison Test          | Difference in rank sum | P value |
| CTRL vs BTZ                              | 15.75                  | P<0.05  |
| CTRL vs BTZ + suvecaltamide 3 mg/kg      | 4.542                  | P>0.05  |
| CTRL vs BTZ + suvecaltamide 10 mg/kg     | 11.13                  | P>0.05  |
| CTRL vs BTZ + suvecaltamide 30 mg/kg     | 4.708                  | P>0.05  |



|                                                              |        |        |
|--------------------------------------------------------------|--------|--------|
| BTZ vs BTZ + suvecaltamide 3 mg/kg                           | -11.21 | P>0.05 |
| BTZ vs BTZ + suvecaltamide 10 mg/kg                          | -4.625 | P>0.05 |
| BTZ vs BTZ + suvecaltamide 30 mg/kg                          | -11.04 | P>0.05 |
| BTZ + suvecaltamide 3 mg/kg vs BTZ + suvecaltamide 10 mg/kg  | 6.583  | P>0.05 |
| BTZ + suvecaltamide 3 mg/kg vs BTZ + suvecaltamide 30 mg/kg  | 0.1667 | P>0.05 |
| BTZ + suvecaltamide 10 mg/kg vs BTZ + suvecaltamide 30 mg/kg | -6.417 | P>0.05 |

| NCV OF CAUDAL NERVE (8 WEEKS) (Figure 1)                     |                        |         |
|--------------------------------------------------------------|------------------------|---------|
| Kruskal-Wallis test                                          |                        |         |
| P value                                                      | P<0.0001               |         |
| Dunn's Multiple Comparison Test                              | Difference in rank sum | P value |
| CTRL vs BTZ                                                  | 37.00                  | P<0.001 |
| CTRL vs BTZ + suvecaltamide 3 mg/kg                          | 25.45                  | P<0.01  |
| CTRL vs BTZ + suvecaltamide 10 mg/kg                         | 14.64                  | P>0.05  |
| CTRL vs BTZ + suvecaltamide 30 mg/kg                         | 6.583                  | P>0.05  |
| BTZ vs BTZ + suvecaltamide 3 mg/kg                           | -11.55                 | P>0.05  |
| BTZ vs BTZ + suvecaltamide 10 mg/kg                          | -22.36                 | P<0.01  |
| BTZ vs BTZ + suvecaltamide 30 mg/kg                          | -30.42                 | P<0.001 |
| BTZ + suvecaltamide 3 mg/kg vs BTZ + suvecaltamide 10 mg/kg  | -10.82                 | P>0.05  |
| BTZ + suvecaltamide 3 mg/kg vs BTZ + suvecaltamide 30 mg/kg  | -18.87                 | P<0.05  |
| BTZ + suvecaltamide 10 mg/kg vs BTZ + suvecaltamide 30 mg/kg | -8.053                 | P>0.05  |

| NCV OF SCIATIC NERVE (BASELINE) (Figure 2) |                        |
|--------------------------------------------|------------------------|
| Mann-Whitney test                          |                        |
| P value                                    | 0.1873                 |
| Exact or approximate P value?              | Gaussian Approximation |



|                                          |              |
|------------------------------------------|--------------|
| One- or two-tailed P value?              | Two-tailed   |
| Sum of ranks in column A (CTRL), B (BTZ) | 124.5, 695.5 |
| Mann-Whitney U                           | 88.50        |

| NCV OF SCIATIC NERVE (4 WEEKS) (Figure 2) |                        |
|-------------------------------------------|------------------------|
| Mann-Whitney test                         |                        |
| P value                                   | 0.0029                 |
| Exact or approximate P value?             | Gaussian Approximation |
| One- or two-tailed P value?               | Two-tailed             |
| Sum of ranks in column A (CTRL), B (BTZ)  | 74, 136                |
| Mann-Whitney U                            | 0.0000                 |

| NCV OF SCIATIC NERVE (5 WEEKS) (Figure 2)                    |                        |         |
|--------------------------------------------------------------|------------------------|---------|
| Kruskal-Wallis test                                          |                        |         |
| P value                                                      | 0.3513                 |         |
| Dunn's Multiple Comparison Test                              | Difference in rank sum | P value |
| CTRL vs BTZ                                                  | 2.250                  | P>0.05  |
| CTRL vs BTZ + suvecaltamide 3 mg/kg                          | 8.917                  | P>0.05  |
| CTRL vs BTZ + suvecaltamide 10 mg/kg                         | 4.833                  | P>0.05  |
| CTRL vs BTZ + suvecaltamide 30 mg/kg                         | 7.500                  | P>0.05  |
| BTZ vs BTZ + suvecaltamide 3 mg/kg                           | 6.667                  | P>0.05  |
| BTZ vs BTZ + suvecaltamide 10 mg/kg                          | 2.583                  | P>0.05  |
| BTZ vs BTZ + suvecaltamide 30 mg/kg                          | 5.250                  | P>0.05  |
| BTZ + suvecaltamide 3 mg/kg vs BTZ + suvecaltamide 10 mg/kg  | -4.083                 | P>0.05  |
| BTZ + suvecaltamide 3 mg/kg vs BTZ + suvecaltamide 30 mg/kg  | -1.417                 | P>0.05  |
| BTZ + suvecaltamide 10 mg/kg vs BTZ + suvecaltamide 30 mg/kg | 2.667                  | P>0.05  |



| NCV OF SCIATIC NERVE (8 WEEKS) (Figure 2)                    |                        |         |
|--------------------------------------------------------------|------------------------|---------|
| Kruskal-Wallis test                                          |                        |         |
| P value                                                      | 0.0059                 |         |
| Dunn's Multiple Comparison Test                              | Difference in rank sum | P value |
| CTRL vs BTZ                                                  | 22.10                  | P<0.05  |
| CTRL vs BTZ + suvecaltamide 3 mg/kg                          | 11.98                  | P>0.05  |
| CTRL vs BTZ + suvecaltamide 10 mg/kg                         | 2.848                  | P>0.05  |
| CTRL vs BTZ + suvecaltamide 30 mg/kg                         | 2.333                  | P>0.05  |
| BTZ vs BTZ + suvecaltamide 3 mg/kg                           | -10.12                 | P>0.05  |
| BTZ vs BTZ + suvecaltamide 10 mg/kg                          | -19.26                 | P<0.05  |
| BTZ vs BTZ + suvecaltamide 30 mg/kg                          | -19.77                 | P<0.05  |
| BTZ + suvecaltamide 3 mg/kg vs BTZ + suvecaltamide 10 mg/kg  | -9.136                 | P>0.05  |
| BTZ + suvecaltamide 3 mg/kg vs BTZ + suvecaltamide 30 mg/kg  | -9.652                 | P>0.05  |
| BTZ + suvecaltamide 10 mg/kg vs BTZ + suvecaltamide 30 mg/kg | -0.5152                | P>0.05  |

| MT TEST (BASELINE) (Figure 3)            |                        |
|------------------------------------------|------------------------|
| Mann-Whitney test                        |                        |
| P value                                  | 0.6572                 |
| Exact or approximate P value?            | Gaussian Approximation |
| One- or two-tailed P value?              | Two-tailed             |
| Sum of ranks in column A (CTRL), B (BTZ) | 194, 1184              |
| Mann-Whitney U                           | 158.0                  |

| MT TEST (4 WEEKS) (Figure 3)  |                        |
|-------------------------------|------------------------|
| Mann-Whitney test             |                        |
| P value                       | 0.0001                 |
| Exact or approximate P value? | Gaussian Approximation |



|                                          |              |
|------------------------------------------|--------------|
| One- or two-tailed P value?              | Two-tailed   |
| Sum of ranks in column A (CTRL), B (BTZ) | 322.5, 758.5 |
| Mann-Whitney U                           | 17.50        |

| MT TEST (5 WEEKS) (Figure 3)                                 |                        |         |
|--------------------------------------------------------------|------------------------|---------|
| Kruskal-Wallis test                                          |                        |         |
| P value                                                      | 0.0065                 |         |
| Dunn's Multiple Comparison Test                              | Difference in rank sum | P value |
| CTRL vs BTZ                                                  | 17.24                  | P<0.05  |
| CTRL vs BTZ + suvecaltamide 3 mg/kg                          | 3.250                  | P>0.05  |
| CTRL vs BTZ + suvecaltamide 10 mg/kg                         | 16.50                  | P<0.05  |
| CTRL vs BTZ + suvecaltamide 30 mg/kg                         | 10.56                  | P>0.05  |
| BTZ vs BTZ + suvecaltamide 3 mg/kg                           | -13.99                 | P>0.05  |
| BTZ vs BTZ + suvecaltamide 10 mg/kg                          | -0.7411                | P>0.05  |
| BTZ vs BTZ + suvecaltamide 30 mg/kg                          | -6.679                 | P>0.05  |
| BTZ + suvecaltamide 3 mg/kg vs BTZ + suvecaltamide 10 mg/kg  | 13.25                  | P>0.05  |
| BTZ + suvecaltamide 3 mg/kg vs BTZ + suvecaltamide 30 mg/kg  | 7.313                  | P>0.05  |
| BTZ + suvecaltamide 10 mg/kg vs BTZ + suvecaltamide 30 mg/kg | -5.938                 | P>0.05  |

| MT TEST (8 WEEKS) (Figure 3)         |                        |         |
|--------------------------------------|------------------------|---------|
| Kruskal-Wallis test                  |                        |         |
| P value                              | 0.0011                 |         |
| Dunn's Multiple Comparison Test      | Difference in rank sum | P value |
| CTRL vs BTZ                          | 23.19                  | P<0.001 |
| CTRL vs BTZ + suvecaltamide 3 mg/kg  | 7.563                  | P>0.05  |
| CTRL vs BTZ + suvecaltamide 10 mg/kg | 16.69                  | P<0.05  |



|                                                              |        |        |
|--------------------------------------------------------------|--------|--------|
| CTRL vs BTZ + suvecaltamide 30 mg/kg                         | 13.50  | P>0.05 |
| BTZ vs BTZ + suvecaltamide 3 mg/kg                           | -15.63 | P>0.05 |
| BTZ vs BTZ + suvecaltamide 10 mg/kg                          | -6.500 | P>0.05 |
| BTZ vs BTZ + suvecaltamide 30 mg/kg                          | -9.688 | P>0.05 |
| BTZ + suvecaltamide 3 mg/kg vs BTZ + suvecaltamide 10 mg/kg  | 9.125  | P>0.05 |
| BTZ + suvecaltamide 3 mg/kg vs BTZ + suvecaltamide 30 mg/kg  | 5.938  | P>0.05 |
| BTZ + suvecaltamide 10 mg/kg vs BTZ + suvecaltamide 30 mg/kg | -3.188 | P>0.05 |

| <b>β-TUBULIN POLYMERIZATION (Figure 4A)</b>                  |                        |         |
|--------------------------------------------------------------|------------------------|---------|
| Kruskal-Wallis test                                          |                        |         |
| P value                                                      | 0.0003                 |         |
| Dunn's Multiple Comparison Test                              | Difference in rank sum | P value |
| CTRL vs BTZ                                                  | -11.88                 | P<0.05  |
| CTRL vs BTZ + suvecaltamide 3 mg/kg                          | -15.63                 | P<0.05  |
| CTRL vs BTZ + suvecaltamide 10 mg/kg                         | -16.13                 | P<0.05  |
| CTRL vs BTZ + suvecaltamide 30 mg/kg                         | 0.3750                 | P>0.05  |
| BTZ vs BTZ + suvecaltamide 3 mg/kg                           | -3.750                 | P>0.05  |
| BTZ vs BTZ + suvecaltamide 10 mg/kg                          | -4.250                 | P>0.05  |
| BTZ vs BTZ + suvecaltamide 30 mg/kg                          | 12.25                  | P>0.05  |
| BTZ + suvecaltamide 3 mg/kg vs BTZ + suvecaltamide 10 mg/kg  | -0.5000                | P>0.05  |
| BTZ + suvecaltamide 3 mg/kg vs BTZ + suvecaltamide 30 mg/kg  | 16.00                  | P>0.05  |
| BTZ + suvecaltamide 10 mg/kg vs BTZ + suvecaltamide 30 mg/kg | 16.50                  | P<0.05  |

| <b>IENF DENSITY (Figure 4B)</b> |          |  |
|---------------------------------|----------|--|
| Kruskal-Wallis test             |          |  |
| P value                         | P<0.0001 |  |



| Dunn's Multiple Comparison Test                              | Difference in rank sum | P value |
|--------------------------------------------------------------|------------------------|---------|
| CTRL vs BTZ                                                  | 28.99                  | P<0.001 |
| CTRL vs BTZ + suvecaltamide 3 mg/kg                          | 18.06                  | P<0.05  |
| CTRL vs BTZ + suvecaltamide 10 mg/kg                         | 28.94                  | P<0.001 |
| CTRL vs BTZ + suvecaltamide 30 mg/kg                         | 8.444                  | P>0.05  |
| BTZ vs BTZ + suvecaltamide 3 mg/kg                           | -10.93                 | P>0.05  |
| BTZ vs BTZ + suvecaltamide 10 mg/kg                          | -0.04167               | P>0.05  |
| BTZ vs BTZ + suvecaltamide 30 mg/kg                          | -20.54                 | P<0.05  |
| BTZ + suvecaltamide 3 mg/kg vs BTZ + suvecaltamide 10 mg/kg  | 10.89                  | P>0.05  |
| BTZ + suvecaltamide 3 mg/kg vs BTZ + suvecaltamide 30 mg/kg  | -9.611                 | P>0.05  |
| BTZ + suvecaltamide 10 mg/kg vs BTZ + suvecaltamide 30 mg/kg | -20.50                 | P<0.01  |

| <b>PROTEASOME INHIBITION (BASELINE) vs BTZ (4 WEEKS) (Figure 5A)</b> |            |
|----------------------------------------------------------------------|------------|
| Mann-Whitney test                                                    |            |
| P value                                                              | 0.0286     |
| Exact or approximate P value?                                        | Exact      |
| One- or two-tailed P value?                                          | Two-tailed |
| Sum of ranks in column A (BTZ baseline), B (BTZ 4 weeks)             | 10, 26     |
| Mann-Whitney U                                                       | 0.0000     |

| <b>TUMOR GROWTH (DAY 18) (Figure 5C right)</b> |                        |         |
|------------------------------------------------|------------------------|---------|
| Kruskal-Wallis test                            |                        |         |
| P value                                        | 0.0005                 |         |
| Dunn's Multiple Comparison Test                | Difference in rank sum | P value |
| Vehicle Control vs BTZ alone                   | 13.13                  | P<0.001 |
| Vehicle Control vs BTZ + suvecaltamide         | 10.13                  | P<0.05  |
| BTZ alone vs BTZ + suvecaltamide               | -3.000                 | P>0.05  |



| TUMOR GROWTH (DAY 28) (Figure 5C right) |                        |
|-----------------------------------------|------------------------|
| Mann-Whitney test                       |                        |
| P value                                 | 0.0070                 |
| Exact or approximate P value?           | Gaussian Approximation |
| One- or two-tailed P value?             | Two-tailed             |
| Sum of ranks in column A (BTZ), B ()    | 92.50, 43.50           |
| Mann-Whitney U                          | 7.500                  |

BTZ = bortezomib; CTRL = control; IENF = intraepidermal nerve fiber; NCV = nerve conduction velocity.

Due to no adjustments for multiplicity, the P values presented are nominal.
